# Supplementary material for: Apigenin Modulates AnxA6- and TNAP-Mediated Osteoblast Mineralization
Source: MDPI journal article supplement (doi:10.3390/ijms232113179), 2022-10-29
Supplement: s1 [file s1]

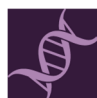

**Table S1.** The effect of apigenin on viability of hFOB 1.19 (A), Saos-2 (B) and HCASMC (C) cells. The cells were incubated with different concentrations ( $\mu\text{M}$ ) of apigenin for 1, 3, 5, 7, 14 days (hFOB 1.19 and Saos-2 cells) or 2, 4, 7, 14, 21 days (HCASMC cells), and then MTT assay was performed. Data are means  $\pm$  S.E. of at least three independent experiments (\*  $p < 0.05$ , \*\*  $p < 0.01$  compared with cells without apigenin).

| A                                        |                     |                     |                     |                     |                     |
|------------------------------------------|---------------------|---------------------|---------------------|---------------------|---------------------|
| hFOB 1.19                                |                     |                     |                     |                     |                     |
| Apigenin concentration ( $\mu\text{M}$ ) | Absorbance          |                     |                     |                     |                     |
|                                          | 1 day               | 3 days              | 5 days              | 7 days              | 14 days             |
| 0                                        | 0.136 $\pm$ 0.014   | 0.161 $\pm$ 0.034   | 0.224 $\pm$ 0.019   | 0.273 $\pm$ 0.051   | 0.385 $\pm$ 0.030   |
| 1                                        | 0.132 $\pm$ 0.017   | 0.151 $\pm$ 0.006   | 0.212 $\pm$ 0.013 * | 0.261 $\pm$ 0.030   | 0.432 $\pm$ 0.024 * |
| 2                                        | 0.137 $\pm$ 0.023   | 0.158 $\pm$ 0.013 * | 0.190 $\pm$ 0.021   | 0.216 $\pm$ 0.029 * | 0.351 $\pm$ 0.036   |
| 5                                        | 0.132 $\pm$ 0.028   | 0.148 $\pm$ 0.030   | 0.175 $\pm$ 0.008   | 0.204 $\pm$ 0.043   | 0.236 $\pm$ 0.036   |
| 10                                       | 0.119 $\pm$ 0.018   | 0.128 $\pm$ 0.010   | 0.135 $\pm$ 0.007   | 0.174 $\pm$ 0.043   | 0.130 $\pm$ 0.024   |
| 20                                       | 0.121 $\pm$ 0.027   | 0.113 $\pm$ 0.017   | 0.115 $\pm$ 0.017   | 0.121 $\pm$ 0.029   | 0.113 $\pm$ 0.017   |
| B                                        |                     |                     |                     |                     |                     |
| Saos-2                                   |                     |                     |                     |                     |                     |
| Apigenin concentration ( $\mu\text{M}$ ) | Absorbance          |                     |                     |                     |                     |
|                                          | 1 day               | 3 days              | 5 days              | 7 days              | 14 days             |
| 0                                        | 0.102 $\pm$ 0.015   | 0.162 $\pm$ 0.030   | 0.266 $\pm$ 0.008   | 0.340 $\pm$ 0.024   | 0.620 $\pm$ 0.073   |
| 1                                        | 0.117 $\pm$ 0.018   | 0.185 $\pm$ 0.028   | 0.251 $\pm$ 0.035   | 0.272 $\pm$ 0.031   | 0.504 $\pm$ 0.061   |
| 2                                        | 0.109 $\pm$ 0.010   | 0.179 $\pm$ 0.021 * | 0.230 $\pm$ 0.037   | 0.245 $\pm$ 0.030   | 0.391 $\pm$ 0.022   |
| 5                                        | 0.113 $\pm$ 0.027   | 0.151 $\pm$ 0.030   | 0.203 $\pm$ 0.015   | 0.229 $\pm$ 0.028   | 0.389 $\pm$ 0.016   |
| 10                                       | 0.116 $\pm$ 0.015   | 0.118 $\pm$ 0.022   | 0.162 $\pm$ 0.024   | 0.191 $\pm$ 0.022   | 0.269 $\pm$ 0.046   |
| 20                                       | 0.094 $\pm$ 0.012   | 0.094 $\pm$ 0.016   | 0.088 $\pm$ 0.011   | 0.092 $\pm$ 0.014   | 0.082 $\pm$ 0.012   |
| C                                        |                     |                     |                     |                     |                     |
| HCASMC                                   |                     |                     |                     |                     |                     |
| Apigenin concentration ( $\mu\text{M}$ ) | Absorbance          |                     |                     |                     |                     |
|                                          | 2 day               | 4 days              | 7 days              | 14 days             | 21 days             |
| 0                                        | 0.133 $\pm$ 0.019   | 0.201 $\pm$ 0.098   | 0.035 $\pm$ 0.015   | 0.145 $\pm$ 0.042   | 0.110 $\pm$ 0.048   |
| 1                                        | 0.245 $\pm$ 0.017 * | 0.047 $\pm$ 0.027   | 0.081 $\pm$ 0.008 * | 0.145 $\pm$ 0.002   | 0.251 $\pm$ 0.071 * |
| 2                                        | 0.234 $\pm$ 0.075   | 0.066 $\pm$ 0.041   | 0.100 $\pm$ 0.020   | 0.115 $\pm$ 0.007 * | 0.382 $\pm$ 0.036   |
| 5                                        | 0.149 $\pm$ 0.015   | 0.071 $\pm$ 0.041   | 0.103 $\pm$ 0.026   | 0.051 $\pm$ 0.042   | 0.385 $\pm$ 0.035   |
| 10                                       | 0.173 $\pm$ 0.056   | 0.125 $\pm$ 0.095   | 0.140 $\pm$ 0.014   | 0.030 $\pm$ 0.046   | 0.365 $\pm$ 0.028   |
| 20                                       | 0.292 $\pm$ 0.024   | 0.208 $\pm$ 0.081   | 0.112 $\pm$ 0.012   | 0.099 $\pm$ 0.020   | 0.203 $\pm$ 0.244   |

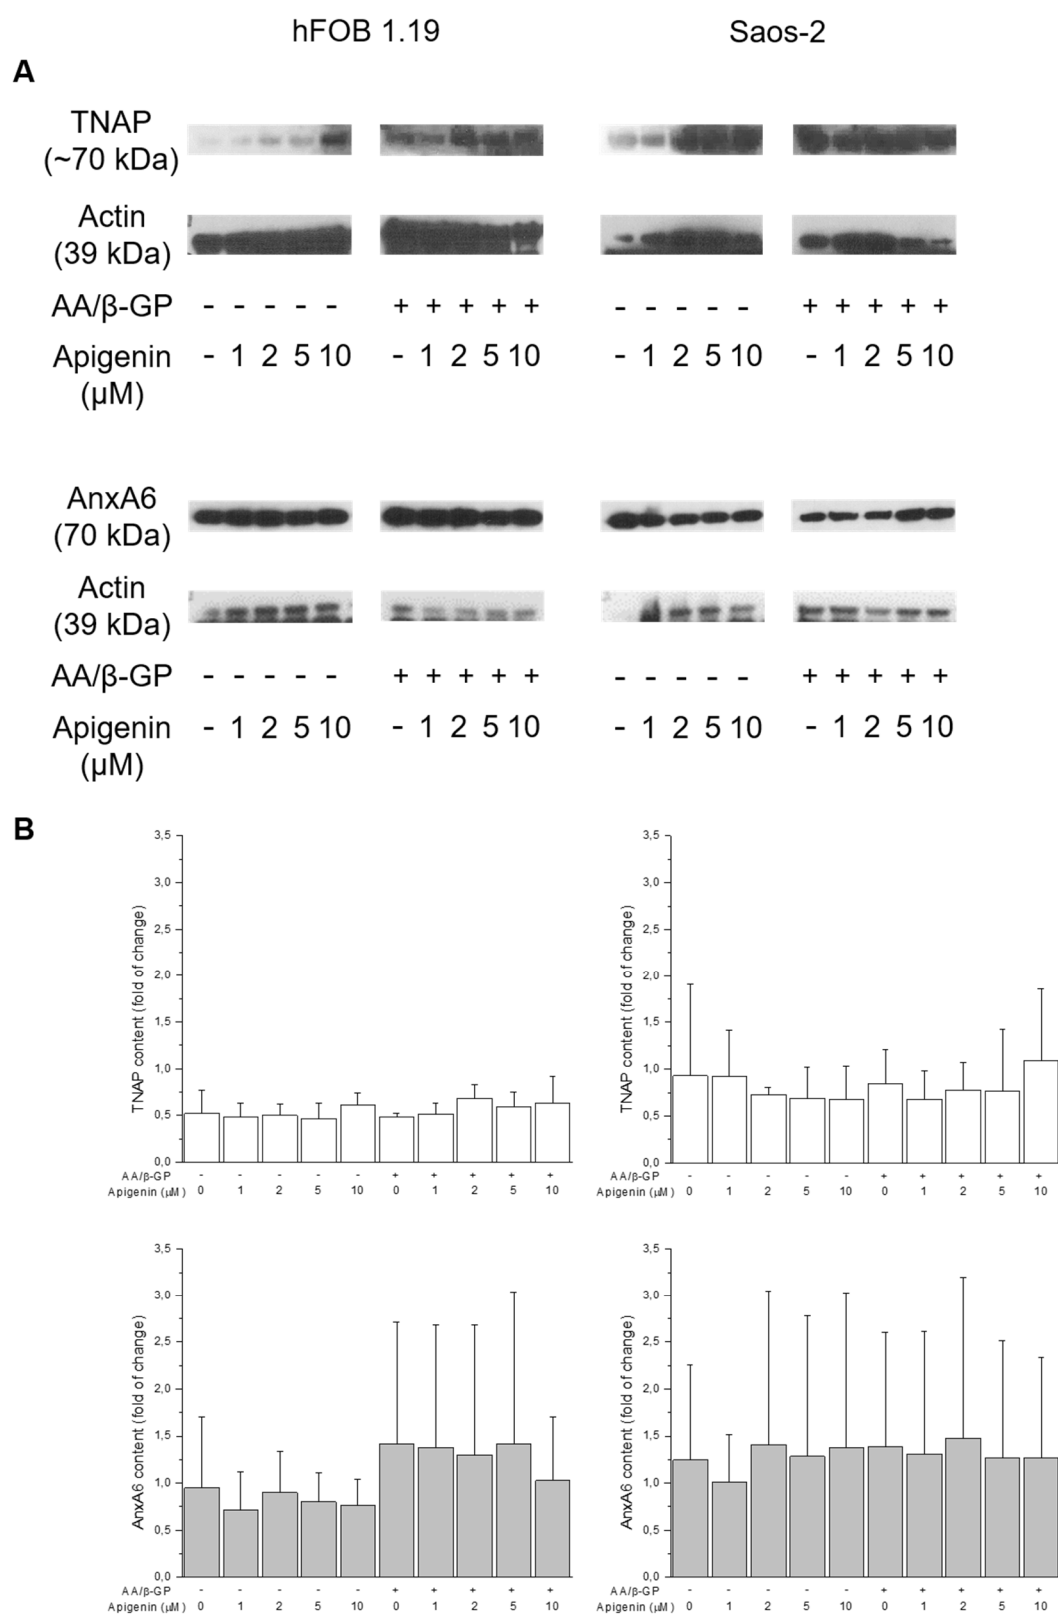

**Figure S1.** Protein level determined by Western Blot (WB) of TNAP, AnxA6 and actin in hFOB 1.19 and Saos-2 cells under resting conditions (R) or after 7 days stimulation with AA and  $\beta$ -GP (S) in control cells and cells subjected to treatment with different concentrations ( $\mu$ M) of apigenin. Whole cell lysates were prepared in TLB. **(A)** WB were incubated with rabbit anti-TNAP and mouse anti-AnxA6 primary antibodies followed by appropriate secondary antibodies conjugated with horseradish peroxidase. The proteins content was quantified using inGenius software (Syngene) and calculated per actin content. **(B)** Data are means  $\pm$  S.E. of at least three independent experiments.

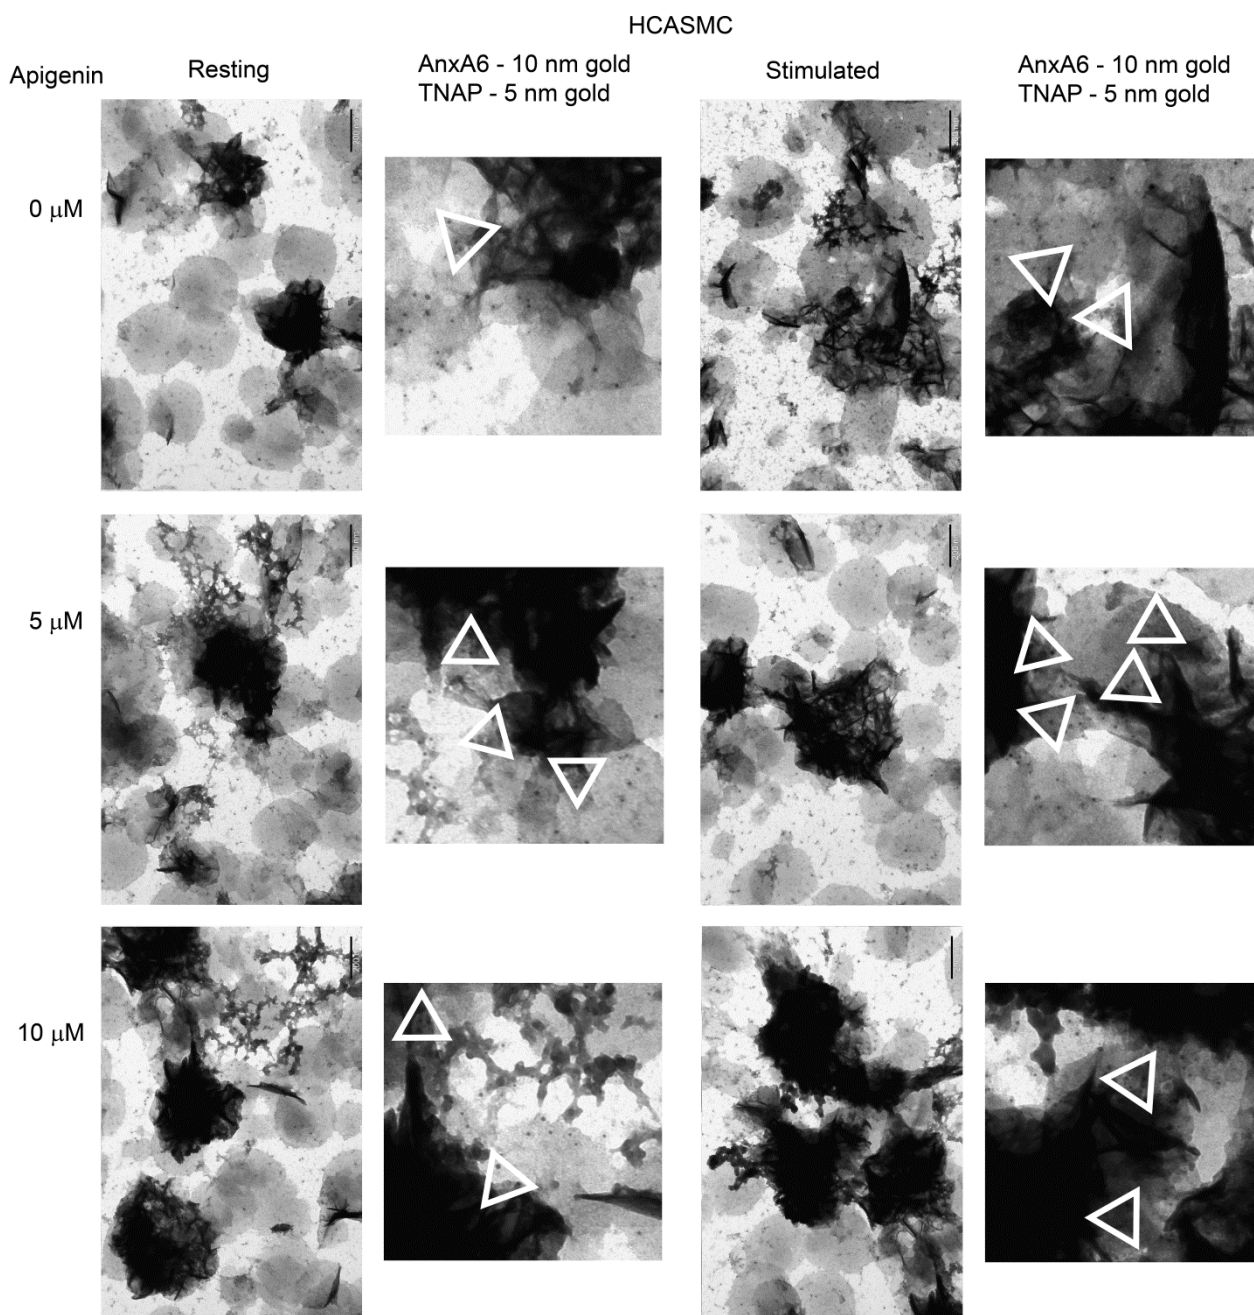

**Figure S2.** TEM images of co-localization of AnxA6 and TNAP in MVs during mineralization of HCASMC cells under resting conditions or in the presence of stimulators, AA and  $\beta$ -GP. Cells were incubated with different concentrations ( $\mu$ M) of apigenin for 14 days, lysed and analyzed by TEM (magnification 100,000 $\times$ ). Bar: 200 nm. Additional magnifications 300,000 $\times$ . AnxA6 was labelled with anti-AnxA6 primary antibody conjugated with 10 nm colloidal gold secondary antibody. TNAP was labelled with anti-TNAP primary antibody conjugated with 5 nm colloidal gold secondary antibody. Sites of AnxA6 and TNAP co-localization are marked by triangles for HCASMC cells.
